# Supplementary material for: Epigenetic inactivation of follistatin-like 1 mediates tumor immune evasion in nasopharyngeal carcinoma
Source: PubMed Central journal article supplement (PMC4941326; doi:10.18632/oncotarget.7654), 2016-02-24
Supplement: oncotarget-07-16433-s001.pdf [file oncotarget-07-16433-s001.pdf]

## Epigenetic inactivation of follistatin-like 1 mediates tumor immune evasion in nasopharyngeal carcinoma

### Supplementary Materials

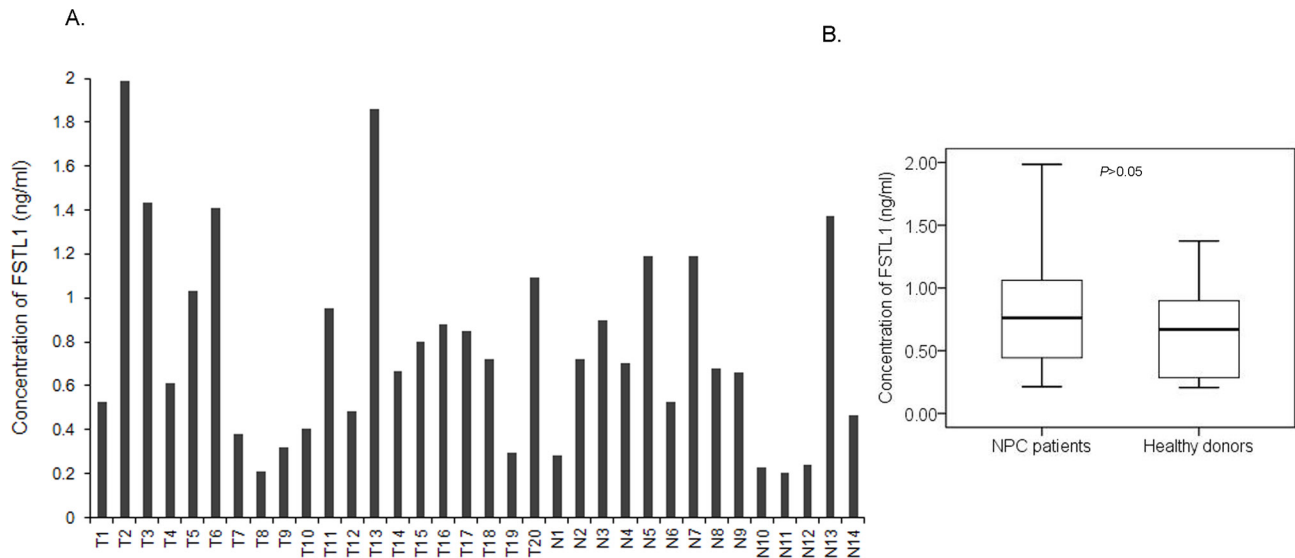

**Supplementary Figure S1: Determine the concentration of FSTL1 in serum by ELISA assay.** (A) Bar graph shows FSTL1 protein level in the serum of NPC patients ( $n = 20$ ) and healthy donors ( $n = 14$ ). (B) The box plots summarize the concentration of FSTL1 in serum. Boxes indicate 25 to 75 percentile, horizontal line indicates the mean, and bars indicate 10 and 90 percentile.

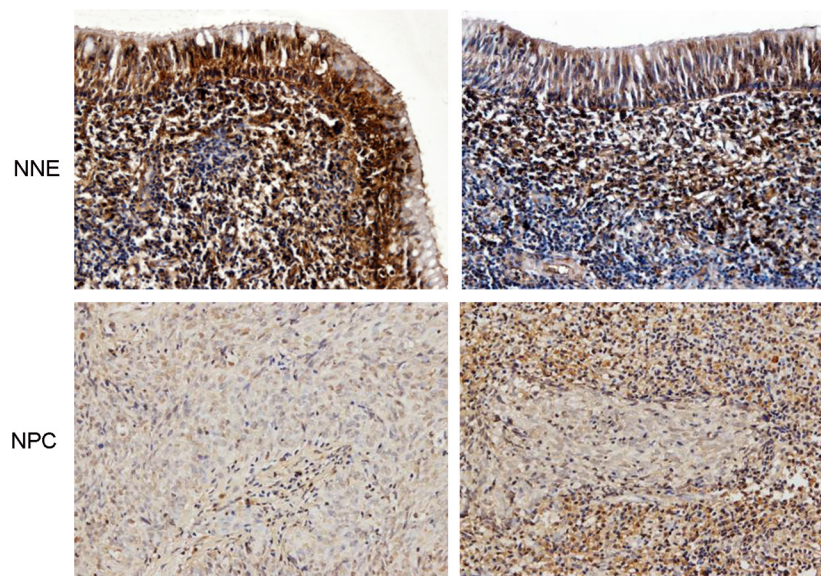

**Supplementary Figure S2: Detection of FSTL1 expression in NPC biopsies and NNE samples by immunohistochemistry staining.** Representative slides of NPC and NNE samples stained by anti-FSTL1 antibody.
